# Supplementary material for: Anisotropic fluid flows in black phosphorus nanochannels
Source: Royal Society of Chemistry journal article supplement (doi:10.1039/d3cp04736a), 2024-01-01
Supplement: d3cp04736a1.pdf [file d3cp04736a1.pdf]

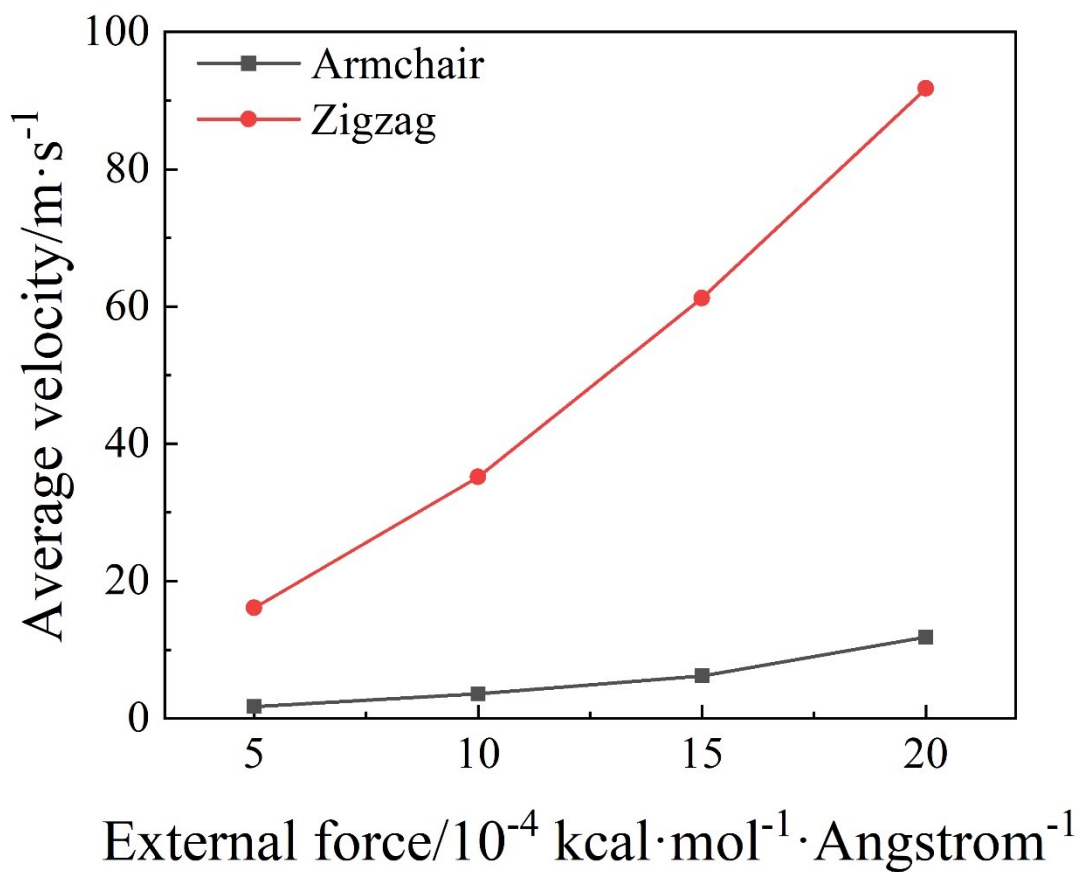

**Figure S1.** The Average velocity for 2-nm BP nanochannels as the external driving force change from  $5\times 10^{-4}$  to  $2\times 10^{-3} \text{ kcal mol}^{-1} \text{ \AA}^{-1}$ .

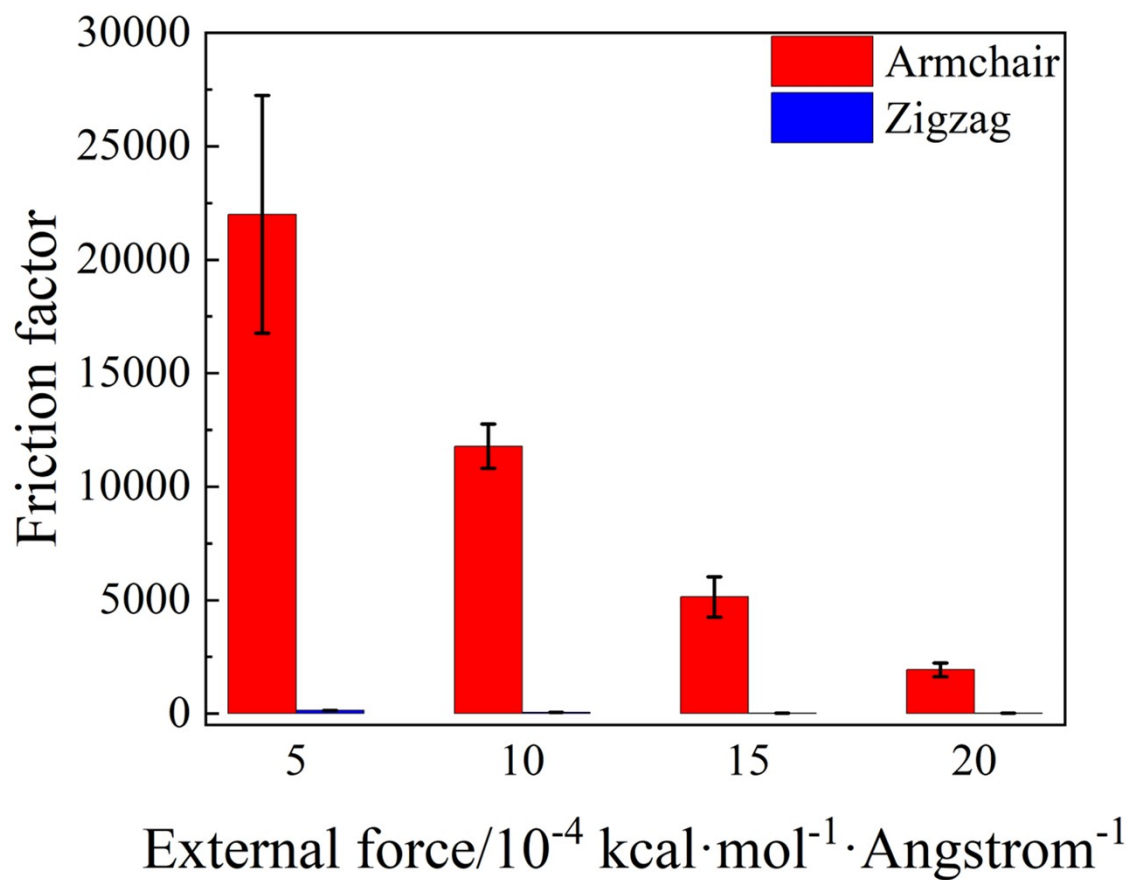

**Figure S2.** Average friction factor between C<sub>12</sub> molecules in the layered structure and BP nanochannels under the external driving force change from  $5 \times 10^{-4}$  to  $2 \times 10^{-3}$  kcal mol<sup>-1</sup> Å<sup>-1</sup>.

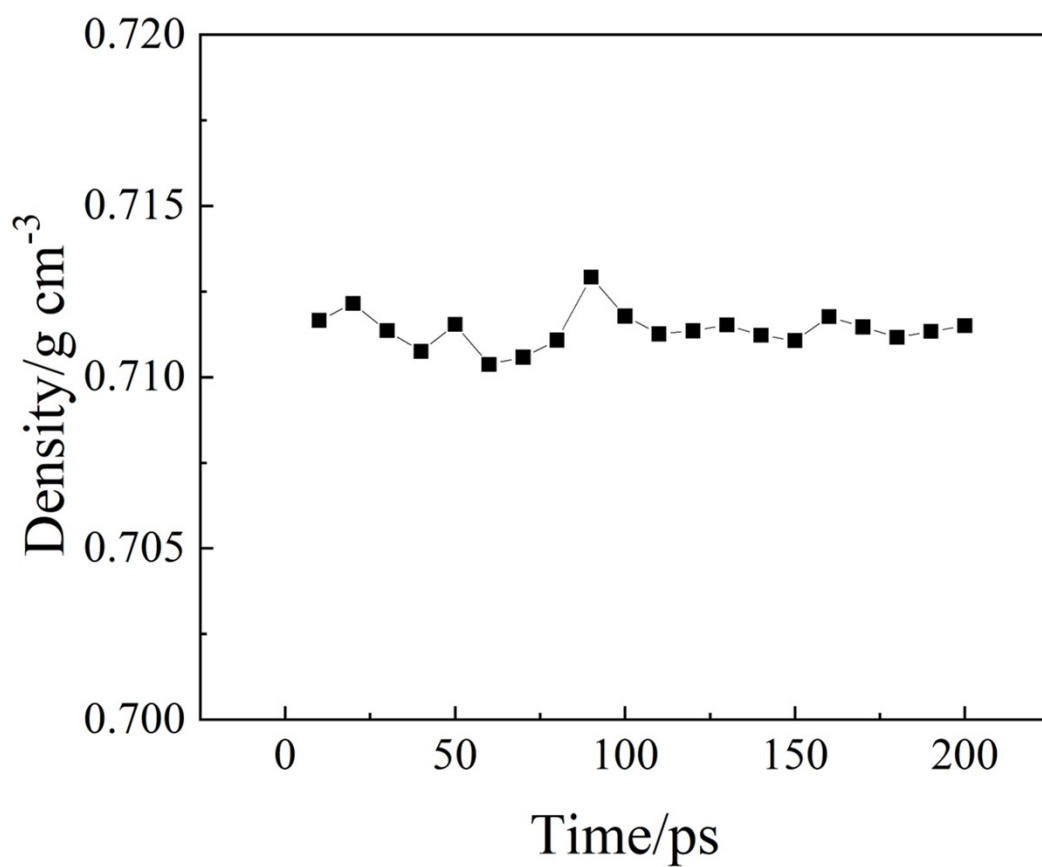

**Figure S3.** The density of pure C<sub>12</sub> in the NVT relaxed process.

**Table S1.** The group forces between the BP nanochannels (armchair and zigzag) and the C12 nanofluid, atomic numbers of C12 in nanochannels with different widths under the external driving force of  $1 \times 10^{-3}$  kcal mol<sup>-1</sup> Å<sup>-1</sup>, and pressure gradients under different conditions.

| Condition      | Atoms number | Group force/<br>kcal mol <sup>-1</sup> Å <sup>-1</sup> | Pressure gradient/<br>kcal mol <sup>-1</sup> Å <sup>-4</sup> |
|----------------|--------------|--------------------------------------------------------|--------------------------------------------------------------|
| 2 nm, armchair | 4180         | 628.565                                                | 0.000072                                                     |
| 2 nm, zigzag   | 4180         | 630.654                                                | 0.000072                                                     |
| 4 nm, armchair | 8360         | 635.836                                                | 0.000081                                                     |
| 4 nm, zigzag   | 8360         | 638.719                                                | 0.000081                                                     |
| 6 nm, armchair | 12540        | 625.060                                                | 0.000086                                                     |
| 6 nm, zigzag   | 12540        | 625.510                                                | 0.000086                                                     |

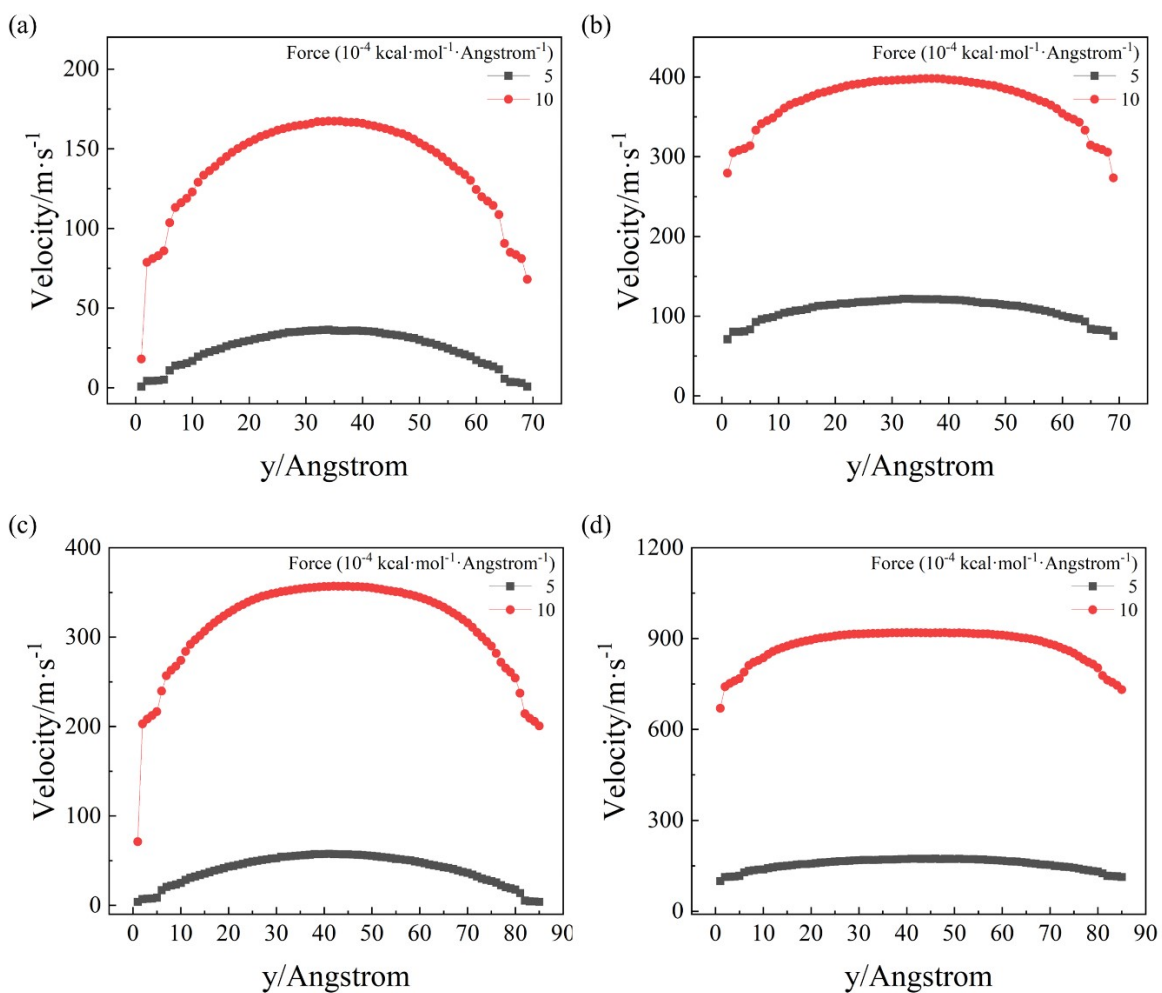

**Figure S4.** Velocity profiles of the  $C_{12}$  molecules confined in 8-nm BP nanochannels when flowing along the (a) armchair direction and (b) zigzag direction. Velocity profiles of the  $C_{12}$  molecules confined in 10-nm BP nanochannels when flowing along the (c) armchair direction and (d) zigzag direction.
